# Supplementary material for: Comparative and functional triatomine genomics reveals reductions and expansions in insecticide resistance-related gene families
Source: PLoS Negl Trop Dis. 2017 Feb 15;11(2):e0005313. doi: 10.1371/journal.pntd.0005313 (PMC5310753; doi:10.1371/journal.pntd.0005313)
Supplement: S5 File — The expression of each transcript in the different transcriptomes (anterior and posterior midgut, hindgut, Malpighian tubules, fat body, gonads and whole body) was represented as number of mapped reads. These R. prolixus tissue-specific transcriptomes were constructed by Oliveira et al. and their sequencing output is publicly available at http://rhodnius.iq.ufrj.br. (XLSX) [file pntd.0005313.s005.xlsx]

## Sheet: Sfile5
	Superfamily	Class/Clade		ID in RproC3.1 geneset	Anterior midgut	Fat body	Malpighian tubules	Posterior midgut	Ovary	Rectum	Testes	Whole body
	CYPs	Mitochondrial		RPRC003140	0	0	0	0	0	0	0	0
				RPRC006417	0	0	0	3	0	0	1	24
				RPRC014382	0	0	0	0	0	0	0	0
				RPRC001745	0	0	0	0	0	0	0	95
				RPRC006945	0	0	0	2	0	0	3	0
				RPRC009414	5	45	48	8	1	2	3	1075
				RPRC007082	1	0	0	1	0	1	0	10
		CYP2		RPRC011595	0	0	0	1	0	0	1	24
				RPRC011241	0	0	0	0	0	1	0	2
				RPRC000592	0	0	0	0	0	1	0	0
				RPRC001301	0	0	0	0	0	5	0	5
				RPRC000513	0	0	0	0	0	0	0	0
				RPRC009370	0	0	0	0	0	0	0	0
				RPRC009377	0	0	0	0	1	0	3	0
				RPRC009372	0	0	0	0	0	0	0	2
		CYP3		RPRC009832	4	1	0	0	4	2	4	39
				RPRC000320	13	0	0	0	25	25	24	60
				RPRC014313	0	0	0	0	0	0	0	0
				RPRC004305	0	0	0	2	1	0	0	12
				RPRC007865	7	0	0	0	0	1	6	22
				RPRC007864	7	0	0	0	0	1	6	22
				RPRC000234	0	0	0	0	0	0	5	1
				RPRC009032	11	0	0	1	15	25	6	62
				RPRC010496	0	0	0	0	0	0	0	0
				RPRC004913	0	0	0	0	0	0	0	0
				RPRC004897	4	0	0	2	3	2	1	24
				RPRC004888	31	0	0	2	26	7	9	69
				RPRC000788	0	0	0	0	0	0	1	6
				RPRC009053	0	0	0	0	0	0	0	0
				RPRC001357	5	0	0	1	14	1	3	11
				RPRC001358	5	0	0	1	14	1	3	11
				RPRC008625	0	0	0	0	0	0	0	0
				RPRC008750	0	0	0	0	0	0	0	0
				RPRC000176	4	0	0	0	1	2	5	17
				RPRC011591	0	0	0	0	0	0	0	0
				RPRC007913	0	0	0	0	0	0	0	0
				RPRC007197	0	0	0	0	0	0	0	0
				RPRC000261	0	0	0	0	0	0	0	0
				RPRC000358	10	2	0	9	5	13	5	26
				RPRC004827	14	0	0	3	5	5	4	25
				RPRC000005+RPRC011373	0	0	0	0	1	0	0	11
				RPRC011368	0	0	0	0	1	0	0	11
				RPRC000171	0	0	0	0	1	0	0	11
				RPRC006625	0	0	0	1	8	12	0	23
				RPRC013612	0	0	0	0	0	0	0	8
				RPRC013598	0	0	0	1	1	1	0	0
				RPRC005503	0	0	0	0	0	0	4	7
				RPRC000046	0	0	0	0	0	0	4	7
				RPRC013597	16	0	0	0	40	0	2	134
				RPRC002146	3	0	0	5	4	0	14	44
				RPRC000795	74	3	1	6	50	47	13	192
				RPRC008405	74	3	1	6	50	47	13	192
				RPRC013614	13	1	0	1	18	3	11	108
				RPRC002590	4	0	0	1	3	1	1	9
				RPRC013613	13	1	0	1	18	3	11	108
				RPRC002592	4	0	0	1	3	1	1	9
				RPRC002591	10	0	1	0	9	5	0	27
				RPRC008431	10	0	1	0	9	5	0	27
				RPRC014138	9	0	0	6	24	6	3	500
				RPRC001678	0	0	0	0	0	1	0	1
				RPRC014201	0	0	0	0	0	0	0	6
				RPRC006536	0	0	0	0	0	0	0	6
				RPRC011301	9	0	0	7	10	2	5	225
				RPRC008835	0	0	0	0	0	0	0	0
				RPRC014708	9	0	0	7	10	2	5	225
				RPRC004242	0	0	0	0	0	1	0	6
				RPRC011370	43	0	0	0	27	6	4	73
				RPRC003089	43	0	0	0	27	6	4	73
				RPRC006739	20	3	2	30	19	13	11	54
				RPRC006697	20	3	2	30	19	13	11	54
		CYP4		RPRC004126	0	0	0	0	0	0	0	0
				RPRC007284	0	0	0	0	0	0	0	0
				RPRC013652	0	0	0	1	0	0	4	8
				RPRC007300	0	0	0	0	0	0	0	0
				RPRC007310	0	0	0	0	0	0	0	0
				RPRC007309	0	0	0	0	3	0	0	22
				RPRC007301	0	0	0	0	3	0	0	22
				RPRC003226	3	0	0	0	0	0	0	2
				RPRC009968	3	0	0	0	0	0	0	2
				RPRC009967	5	0	0	0	2	0	0	23
				RPRC005182	0	0	0	0	0	0	0	0
				RPRC002131	0	0	0	0	0	0	0	0
				RPRC005286	0	0	0	0	0	0	0	0
				RPRC000277	8	0	0	0	10	50	2	104
				RPRC003225	8	0	0	0	10	50	2	104
				RPRC005184	0	0	0	0	0	0	2	4
				RPRC005136	0	0	0	0	0	0	2	4
				RPRC002132	0	0	0	0	0	0	2	4
				RPRC013674	0	0	0	0	0	0	0	0
				RPRC005323	0	0	0	0	0	0	17	7
				RPRC007948	0	0	0	0	0	0	0	2
				RPRC007953	0	0	0	0	0	0	0	0
				RPRC007304	0	0	0	0	0	0	0	0
				RPRC007947	0	0	0	0	0	0	0	0
				RPRC000172	0	0	0	0	0	0	0	0
				RPRC007299	0	0	0	0	0	0	1	7
				RPRC008267	0	0	0	0	0	0	0	0
				RPRC010477	1	0	0	0	0	0	2	6
				RPRC007307	0	0	0	0	0	0	0	0
				RPRC007950	0	0	0	0	0	0	0	0
				RPRC007949	0	0	0	0	0	0	0	0
				RPRC007305	1	0	0	0	0	0	2	6
				RPRC007952	1	0	0	0	0	0	2	6
				RPRC002481	1	0	0	0	0	0	2	6
				RPRC005934	0	0	0	0	0	0	0	0
				RPRC003227	8	0	0	1	16	3	6	77
				RPRC013847	0	0	0	0	0	0	2	0
				RPRC000027	13	2	0	0	15	20	12	27
				RPRC002974	0	0	0	0	0	1	0	23
				RPRC015287	39	2	0	8	13	43	3	19
				RPRC015286	39	2	0	8	13	43	3	19
				RPRC009721	0	0	0	0	0	0	13	23
				RPRC004758	2	2	0	2	4	0	3	22
				RPRC000196	0	0	0	0	3	0	0	0
				RPRC004766	20	0	0	6	6	9	7	61
				RPRC004736	0	0	0	0	0	0	0	4
				RPRC004733	0	0	0	1	0	0	1	1
				RPRC004731	8	0	0	4	2	1	3	37
				RPRC004769	7	1	0	0	2	1	13	30
	CCEs	Pheromone/	E	RPRC003620	2	0	0	0	0	0	0	14
		hormone		RPRC012523	0	0	0	6	0	1	0	1
		processing		RPRC003619	0	0	0	0	0	0	3	3
				RPRC003578	2	0	0	0	0	0	0	14
				RPRC003733	0	0	0	0	0	0	0	0
				RPRC003093	3	0	0	1	0	0	1	4
				RPRC007919	8	0	0	4	3	2	4	20
				RPRC007965	8	0	0	4	3	2	4	20
				RPRC003806	3	0	0	1	0	0	4	3
				RPRC003808	3	0	0	1	0	0	4	3
				RPRC001592	0	0	0	0	0	0	0	0
				RPRC007702	0	0	0	0	0	0	0	0
				RPRC007698	4	0	0	0	2	0	0	13
				RPRC007700	0	0	0	0	0	0	0	0
				RPRC007696	4	0	0	0	2	0	0	13
				RPRC008235	14	0	0	2	24	15	16	108
				RPRC008217	14	0	0	2	24	15	16	108
				RPRC003566	2	0	0	3	1	0	8	13
				RPRC003606	0	0	0	0	0	0	0	0
				RPRC003565	1	0	0	0	0	1	0	1
				RPRC003564	0	0	0	0	0	0	0	3
				RPRC003605	0	0	0	0	0	0	0	0
				RPRC010263	0	0	0	0	0	0	0	0
				RPRC010261	0	0	0	0	0	0	0	0
				RPRC010262	0	0	0	0	0	0	0	0
				RPRC001239	0	0	0	0	7	6	0	5
				RPRC010259	0	0	0	0	0	0	0	0
				RPRC010260	0	0	0	0	0	0	0	0
				RPRC004681	0	0	0	0	7	6	0	5
				RPRC010265	0	0	0	0	7	6	0	5
				RPRC004680	0	0	0	0	0	0	0	0
				RPRC010267	0	0	0	0	0	0	7	26
				RPRC010224	0	0	0	0	0	4	0	0
				RPRC010268	4	2	23	1	5	6	8	85
				RPRC010226	4	2	23	1	5	6	8	85
				RPRC014627	0	0	0	0	0	0	0	3
				RPRC010228	0	0	0	0	0	0	0	3
				RPRC010231	0	0	0	0	0	0	0	3
				RPRC014625	0	0	0	0	0	0	0	3
				RPRC014623	0	0	0	0	0	0	0	3
			H	RPRC007352	37	1	2	1	57	44	10	194
				RPRC002814	0	0	0	0	0	0	0	2
			I	RPRC005626	0	0	0	0	0	0	0	0
			J	RPRC000482	0	0	1	0	0	0	0	79
				RPRC003013	0	0	0	0	0	0	0	0
			K	RPRC005115	0	0	0	0	0	0	0	0
			L	RPRC001512	0	0	0	0	0	0	0	0
				RPRC006234	0	0	0	0	0	0	0	0
				RPRC000840	0	0	0	0	0	0	0	0
				RPRC001231	0	0	0	0	0	0	0	0
				RPRC007770	0	0	0	0	0	0	0	0
				RPRC012978	0	0	0	0	0	0	0	0
				RPRC006235	0	0	0	0	0	0	0	0
				RPRC013129	0	0	0	0	0	0	195	30
				RPRC001403	0	0	0	0	0	0	0	0
				RPRC001513	0	0	0	0	0	0	0	0
				RPRC002570	0	0	0	0	0	0	0	0
				RPRC006236	0	0	0	0	0	0	0	0
				RPRC012977	0	0	0	0	0	0	0	0
			M	RPRC000721	0	0	0	0	0	0	0	0
				RPRC013515	0	0	0	0	0	0	0	0
	GSTs	Delta		RPRC013179	0	0	0	0	0	2	0	11
		Omega		RPRC007741	21	0	0	0	11	11	8	2
		Sigma		RPRC002917	1	0	0	0	0	0	4	2
				RPRC007353	181	0	0	0	180	166	35	83
				RPRC009365	5	0	0	4	15	1	2	24
				RPRC010609	4	0	0	2	5	8	2	9
				RPRC011128	0	0	0	0	0	0	0	0
				RPRC011244	1	26	7	0	10	7	1	25
				RPRC015269	2	0	0	0	0	0	0	2
		Theta		RPRC009138	157	0	2	0	121	32	11	49
				RPRC009358	157	0	2	0	121	32	11	49
				RPRC009617	52	0	1	3	29	40	14	162
		Zeta		RPRC014626	1	0	0	0	0	0	0	7
		Microsomal		RPRC001773	1	0	0	0	5	3	4	102
